# Supplementary material
Source: PubMed Central journal article supplement (PMC10123759)
Supplement: NIHMS1891686-supplement-1.pdf [file NIHMS1891686-supplement-1.pdf]

**Supplemental Table 1.** Association between *MUC5B* variant and ILD according to ILD pattern.

|                | <b><u>MUC5B variant positive</u></b> |                  | <b>OR (95% CI)</b> | <b>p value</b> |
|----------------|--------------------------------------|------------------|--------------------|----------------|
|                | <b>RA-ILD</b>                        | <b>RA no-ILD</b> |                    |                |
| <b>All ILD</b> | 78/238 (32.8%)                       | 413/2323 (17.8%) | 2.25 (1.69, 3.02)  | <0.001         |
| <b>UIP</b>     | 28/70 (40.0%)                        | 412/2320 (17.8%) | 3.09 (1.89, 5.04)  | <0.001         |
| <b>Non-UIP</b> | 8/32 (25.0%)                         | 412/2321 (17.8%) | 1.54 (0.69, 3.46)  | 0.29           |

Abbreviations: OR (odds ratio), CI (confidence interval), ILD (interstitial lung disease), UIP (usual interstitial pneumonia)

Non-UIP group includes all other patterns of ILD.

**Supplemental Table 2.** Association between *MUC5B* promoter variant and RA duration at time of ILD diagnosis.

|                                       | <b><u>MUC5B variant positive</u></b> |                  | <b>OR (95% CI)</b> | <b>p value</b> |
|---------------------------------------|--------------------------------------|------------------|--------------------|----------------|
|                                       | <b>RA-ILD</b>                        | <b>RA no-ILD</b> |                    |                |
| <b>All ILD</b>                        | 78/238 (32.8%)                       | 413/2323 (17.8%) | 2.25 (1.69, 3.02)  | <0.001         |
| <b>ILD &lt;7 years after RA onset</b> | 35/114 (30.7%)                       | 207/1140 (18.2%) | 2.00 (1.30, 3.06)  | 0.001          |
| <b>ILD ≥7 years after RA onset</b>    | 43/124 (34.7%)                       | 206/1183 (17.4%) | 2.51 (1.69, 3.75)  | <0.001         |

Abbreviations: RA (rheumatoid arthritis), ILD (interstitial lung disease), OR (odds ratio), CI (confidence interval)

Time from RA diagnosis to ILD diagnosis categorized as before or after 7 years, based on the median value.

**Supplemental Table 3.** Associations between the *MUC5B* promoter variant and chronic obstructive pulmonary disease (COPD) or bronchiectasis.

|                                 | <b>RA-COPD<br/>(N=841)</b> | <b>RA no-COPD<br/>(N=1478)</b> | <b>OR (95% CI)</b>                         | <b>p value</b> |
|---------------------------------|----------------------------|--------------------------------|--------------------------------------------|----------------|
| <b><i>MUC5B</i> rs35705950</b>  |                            |                                |                                            |                |
|                                 | Number (%)                 |                                |                                            |                |
| Never smoker/ <i>MUC5B</i> neg. | 77 (9.2)                   | 361 (24.4)                     | 1 (Ref)                                    | -              |
| Never smoker/ <i>MUC5B</i> pos. | 14 (1.7)                   | 85 (5.7)                       | 0.77 (0.42, 1.43)                          | 0.41           |
| Ever smoker/ <i>MUC5B</i> neg.  | 608 (72.3)                 | 862 (58.3)                     | 3.31 (2.53, 4.32)                          | <0.001         |
| Ever smoker/ <i>MUC5B</i> pos.  | 142 (16.9)                 | 171 (11.6)                     | 3.89 (2.79, 5.42)                          | <0.001         |
|                                 |                            |                                | <b>RERI 0.82 (-0.23, 1.93)<sup>a</sup></b> |                |

<sup>a</sup>Relative excess risk due to interaction (RERI) is represented as relative risk with 95% CI.  
Abbreviations: COPD (chronic obstructive pulmonary disease), OR (odds ratio), CI (confidence interval), ILD (interstitial lung disease), COPD (chronic obstructive pulmonary disease), RERI (relative excess risk due to interaction)
